# Supplementary material for: Utility of the Biosynthetic Folate Pathway for Targets in Antimicrobial Discovery
Source: Antibiotics (Basel). 2014 Jan 21;3(1):1–28. doi: 10.3390/antibiotics3010001 (PMC4790348; doi:10.3390/antibiotics3010001)
Supplement: Supplementary File 1 [file antibiotics-03-00001-s001.xlsx]

## Sheet: Custom Report
Supplementary Table 1. This table curates all three-dimensional structures deposited in the Protein Databank, available as of October 27, 2013, for the seven bacterial folate biosynthesis enzymes discussed in the text. This table includes the organism used as the source of the enzyme, the complexed ligands and the primary citations.
PDB ID	Source	Ligand Name	Resolution	E.C. number	Pub. Year	Title	Journal Name	Volume	First Page	PubMed ID
1. GCH I
1A8R	Escherichia coli	GUANOSINE-5'-TRIPHOSPHATE	2.10	3.5.4.16	2003	Biosynthesis of pteridines. Reaction mechanism of GTP cyclohydrolase I.	J.Mol.Biol.	326	503	12559918
1N3R	Escherichia coli	GUANOSINE-5'-TRIPHOSPHATE	2.80	3.5.4.16	2003	Biosynthesis of Pteridines. Reaction Mechanism of GTP Cyclohydrolase I	J.MOL.BIOL.	326	503	12559918
1N3S	Escherichia coli	GUANOSINE-5'-TRIPHOSPHATE	2.55	3.5.4.16	2003	Biosynthesis of Pteridines. Reaction Mechanism of GTP Cyclohydrolase I	J.MOL.BIOL.	326	503	12559918
1N3T	Escherichia coli	GUANOSINE-5'-TRIPHOSPHATE	3.20	3.5.4.16	2003	Biosynthesis of Pteridines. Reaction Mechanism of GTP Cyclohydrolase I	J.MOL.BIOL.	326	503	12559918
1FBX	Escherichia coli		2.80	3.5.4.16	2000	Zinc plays a key role in human and bacterial GTP cyclohydrolase I.	Proc.Natl.Acad.Sci.USA	97	13567	11087827
1GTP	Escherichia coli		3.00	3.5.4.16	1995	Atomic structure of GTP cyclohydrolase I.	Structure	3	459	7663943
1A9C	Escherichia coli	GUANOSINE-5'-TRIPHOSPHATE	2.90	3.5.4.16		GTP Cyclohydrolase I in Complex with GTP at 2.1 A Resolution	To be Published
1FB1	Homo sapiens	ISOPROPYL ALCOHOL, Zinc	3.10	3.5.4.16	2000	Zinc plays a key role in human and bacterial GTP cyclohydrolase I.	Proc.Natl.Acad.Sci.USA	97	13567	11087827
3D1T	Neisseria gonorrhoeae		2.20	3.5.4.16	2009	Zinc-independent folate biosynthesis: genetic, biochemical, and structural investigations reveal new metal dependence for GTP cyclohydrolase IB	J.Bacteriol.	191	6936	19767425
3D2O	Neisseria gonorrhoeae		2.04	3.5.4.16	2009	Zinc-independent folate biosynthesis: genetic, biochemical, and structural investigations reveal new metal dependence for GTP cyclohydrolase IB	J.Bacteriol.	191	6936	19767425
2R5R	Nitrosomonas europaea ATCC 19718	IMIDAZOLE	3.05	3.5.4.16		The crystal structure of DUF198 from Nitrosomonas europaea ATCC 19718.	To be Published
1WPL	Rattus norvegicus	7,8-DIHYDROBIOPTERIN, TRIPHOSPHATE	2.80	3.5.4.16	2004	Structural basis of biopterin-induced inhibition of GTP cyclohydrolase I by GFRP, its feedback regulatory protein	J.Biol.Chem.	279	51534	15448133
1IS7	Rattus norvegicus		2.80	3.5.4.16	2002	Crystal structure of the stimulatory complex of GTP cyclohydrolase I and its feedback regulatory protein GFRP.	Proc.Natl.Acad.Sci.USA	99	1212	11818540
1IS8	Rattus norvegicus		2.70	3.5.4.16	2002	Crystal structure of the stimulatory complex of GTP cyclohydrolase I and its feedback regulatory protein GFRP.	Proc.Natl.Acad.Sci.USA	99	1212	11818540
1WM9	Thermus thermophilus		2.20	3.5.4.16	2005	Novel Reaction Mechanism of GTP Cyclohydrolase I. High-Resolution X-Ray Crystallography of Thermus thermophilus HB8 Enzyme Complexed with a Transition State Analogue, the 8-Oxoguanine Derivative.	J.Biochem.(Tokyo)	138	263	16169877
1WUQ	Thermus thermophilus	8-OXO-GUANOSINE-5'-TRIPHOSPHATE, Zinc	2.00	3.5.4.16	2005	Novel reaction mechanism of GTP cyclohydrolase I. High-resolution X-ray crystallography of Thermus thermophilus HB8 enzyme complexed with a transition state analogue, the 8-oxoguanine derivative	J.Biochem.(Tokyo)	138	263	16169877
1WUR	Thermus thermophilus	8-OXO-2'-DEOXYGUANOSINE-5'-TRIPHOSPHATE, Zinc	1.82	3.5.4.16	2005	Novel reaction mechanism of GTP cyclohydrolase I. High-resolution X-ray crystallography of Thermus thermophilus HB8 enzyme complexed with a transition state analogue, the 8-oxoguanine derivative	J.Biochem.(Tokyo)	138	263	16169877
4DU6	Yersinia pseudotuberculosis	GUANOSINE-5'-TRIPHOSPHATE	2.11	3.5.4.16	To be Published	Crystal structure of GTP cyclohydrolase I from Yersinia pestis complexed with GTP
2. DHNTPase
2O1C	Escherichia coli	PYROPHOSPHATE	1.80	3.6.1.n4	2007	Structure and function of the E. coli dihydroneopterin triphosphate pyrophosphatase: a Nudix enzyme involved in folate biosynthesis.	Structure	15	1014	17698004
2O5W	Escherichia coli	PYROPHOSPHATE	2.60	3.6.1.n4	2007	Structure and function of the E. coli dihydroneopterin triphosphate pyrophosphatase: a Nudix enzyme involved in folate biosynthesis.	Structure	15	1014	17698004
3a. DHNA
2O90	Escherichia coli	L-NEOPTERIN	1.07	4.1.2.25		Active Site Architecture of Dihydroneopterin Aldolase from Escherichia Coli	To be Published
1NBU	Mycobacterium tuberculosis	2-AMINO-6-HYDROXYMETHYL-7,8-DIHYDRO-3H-PTERIDIN-4-ONE	1.60	4.1.2.25	2005	Regulation by oligomerization in a mycobacterial folate biosynthetic enzyme.	J.Mol.Biol.	349	61	15876368
1Z9W	Mycobacterium tuberculosis H37Rv		2.50	4.1.2.25	2005	Regulation by oligomerization in a mycobacterial folate biosynthetic enzyme.	J.Mol.Biol.	349	61	15876368
1RRI	Staphylococcus aureus	3-(5-AMINO-7-HYDROXY-[1,2,3]TRIAZOLO[4,5-D]PYRIMIDIN-2-YL)-BENZOIC ACID	2.00	4.1.2.25	2004	Discovery of Potent Inhibitors of Dihydroneopterin Aldolase Using CrystaLEAD High-Throughput X-ray Crystallographic Screening and Structure-Directed Lead Optimization.	J.Med.Chem.	47	1709	15027862
1RRW	Staphylococcus aureus	9-METHYLGUANINE	2.21	4.1.2.25	2004	Discovery of Potent Inhibitors of Dihydroneopterin Aldolase Using CrystaLEAD High-Throughput X-ray Crystallographic Screening and Structure-Directed Lead Optimization.	J.Med.Chem.	47	1709	15027862
1RRY	Staphylococcus aureus	2-AMINO-4-HYDROXYPYRIMIDINE-5-CARBOXYLIC ACID ETHYL ESTER	2.70	4.1.2.25	2004	Discovery of Potent Inhibitors of Dihydroneopterin Aldolase Using CrystaLEAD High-Throughput X-ray Crystallographic Screening and Structure-Directed Lead Optimization.	J.Med.Chem.	47	1709	15027862
1RS2	Staphylococcus aureus	8-AMINO-1,3-DIMETHYL-3,7-DIHYDROPURINE-2,6-DIONE	2.31	4.1.2.25	2004	Discovery of Potent Inhibitors of Dihydroneopterin Aldolase Using CrystaLEAD High-Throughput X-ray Crystallographic Screening and Structure-Directed Lead Optimization.	J.Med.Chem.	47	1709	15027862
1RS4	Staphylococcus aureus	3-(5-AMINO-7-HYDROXY-[1,2,3]TRIAZOLO[4,5-D]PYRIMIDIN-2-YL)-N-(3,5-DICHLOROBENZYL)-BENZAMIDE	2.70	4.1.2.25	2004	Discovery of Potent Inhibitors of Dihydroneopterin Aldolase Using CrystaLEAD High-Throughput X-ray Crystallographic Screening and Structure-Directed Lead Optimization.	J.Med.Chem.	47	1709	15027862
1RSD	Staphylococcus aureus	3-(5-AMINO-7-HYDROXY-[1,2,3]TRIAZOLO[4,5-D]PYRIMIDIN-2-YL)-N-[2-(2-(HYDROXYMETHYL-PHENYLSULFANYL)-BENZYL]-BENZAMIDE	2.50	4.1.2.25	2004	Discovery of Potent Inhibitors of Dihydroneopterin Aldolase Using CrystaLEAD High-Throughput X-ray Crystallographic Screening and Structure-Directed Lead Optimization.	J.Med.Chem.	47	1709	15027862
1RSI	Staphylococcus aureus	2-AMINO-5-BROMO-6-PHENYLPYRIMIDIN-4-OL	2.20	4.1.2.25	2004	Discovery of Potent Inhibitors of Dihydroneopterin Aldolase Using CrystaLEAD High-Throughput X-ray Crystallographic Screening and Structure-Directed Lead Optimization.	J.Med.Chem.	47	1709	15027862
1U68	Staphylococcus aureus	2-AMINO-7,8-DIHYDRO-6-(1,2,3-TRIHYDROXYPROPYL)-4(1H)-PTERIDINONE	2.40	4.1.2.25	2004	Discovery of potent inhibitors of dihydroneopterin aldolase using CrystaLEAD high-throughput X-ray crystallographic screening and structure-directed lead optimization.	J.MED.CHEM.	47	1709	15027862
2NM2	Staphylococcus aureus	L-NEOPTERIN	1.70	4.1.2.25	2007	Structural basis for the aldolase and epimerase activities of Staphylococcus aureus dihydroneopterin aldolase.	J.Mol.Biol.	368	161	17331536
2NM3	Staphylococcus aureus	D-MONAPTERIN	1.68	4.1.2.25	2007	Structural basis for the aldolase and epimerase activities of Staphylococcus aureus dihydroneopterin aldolase.	J.Mol.Biol.	368	161	17331536
2CG8	STREPTOCOCCUS PNEUMONIAE		2.90	4.1.2.25	2006	Crystal Structure of the Bifunctional Dihydroneopterin Aldolase/6-Hydroxymethyl-7,8-Dihydropterin Pyrophosphokinase from Streptococcus Pneumoniae.	J.Mol.Biol.	360	644	16781731
3R2E	Yersinia pestis		2.15	4.1.2.25		Dihydroneopterin aldolase/dihydroneopterin triphosphate 2'-epimerase from Yersinia pestis	To be Published
3b. PTPS
2G64	Caenorhabditis elegans		1.80	4.2.3.12	To be Published	Crystal Structure of Caenorhabditis Elegans 6-Pyruvoyl Tetrahydropterin Synthase
3QN0	Escherichia coli		2.34	4.2.3.12	To be Published	Structure of hexameric 6-pyruvoyltetrahydropterin synthase
3QN9	Escherichia coli		2.93	4.2.3.12	To be Published	Crystal structure of a 6-pyruvoyltetrahydropterin synthase homologue from Esherichia coli
3QNA	Escherichia coli	BIOPTERIN	2.50	4.2.3.12	To be Published	Crystal structure of a 6-pyruvoyltetrahydropterin synthase homologue from Esherichia coli complexed sepiapterin
3I2B	Homo sapiens	1,2-ETHANEDIOL, DI(HYDROXYETHYL)ETHER	2.30	4.2.3.12	To be Published	The crystal structure of human 6 Pyruvoyl Tetrahydrobiopterin Synthase
1Y13	Plasmodium falciparum	BIOPTERIN	2.20	4.2.3.12	To be Published	Structural Analysis of Plasmodium falciparum 6-pyruvoyl tetrahydropterin synthase (PTPS)
2A0S	Plasmodium vivax	BIOPTERIN	2.20	4.2.3.12	To be Published	Crystal structure of 6-pyruvoyl tetrahydropterin synthase (PTPS) from Plasmodium vivax at 2.2 A resolution
3LX3	Plasmodium vivax	2-AMINO-1,5-DIHYDROPTERIDINE-4,6-DIONE	1.55	4.2.3.12	To be Published	Structural analysis of the dual-functional 6-pyruvoyltetrahydropterin synthase from Malaria parasites.
3LZE	Plasmodium vivax	PTERINE	1.90	4.2.3.12	To be Published	Structural analysis of the dual-functional 6-pyruvoyltetrahydropterin synthase from Malaria parasites.
3M0N	Plasmodium vivax	PTERINE	1.90	4.2.3.12	To be Published	Structural analysis of the dual-functional 6-pyruvoyltetrahydropterin synthase from Malaria parasites.
2OBA	Pseudomonas aeruginosa	ZINC ION	2.33	4.2.3.12	To be Published	Pseudomonas aeruginosa 6-pyruvoyl tetrahydrobiopterin synthase
2DJ6	Pyrococcus horikoshii		2.10	4.2.3.12	To be Published	Crystal structure of 6-pyruvoyl tetrahydrobiopterin synthase from Pyrococcus horikoshii OT3
4. HPPK
4AD6		7-(2-HYDROXYETHYL)-8-MERCAPTOGUANINE	1.85	2.7.6.3	To be Published	Synthesis and Sar Study of Guanine Based Analogues for Hppk Inhibitors
1F9H	Escherichia coli	DIPHOSPHOMETHYLPHOSPHONIC ACID ADENOSYL ESTER; 2-AMINO-6-HYDROXYMETHYL-7,8-DIHYDRO-3H-PTERIDIN-4-ONE	1.5	2.7.6.3	2003	Dynamic Roles of Arginine Residues 82 and 92 of Escherichia coli 6-Hydroxymethyl-7,8-dihydropterin Pyrophosphokinase: Crystallographic Studies	Biochemistry	42	1573	12578370
1G4C	Escherichia coli	CHLORIDE ION	1.65	2.7.6.3	2003	Dynamic Roles of Arginine Residues 82 and 92 of Escherichia coli 6-Hydroxymethyl-7,8-dihydropterin Pyrophosphokinase: Crystallographic Studies	Biochemistry	42	1573	12578370
1HQ2	Escherichia coli	DIPHOSPHOMETHYLPHOSPHONIC ACID ADENOSYL ESTER; 2-AMINO-6-HYDROXYMETHYL-7,8-DIHYDRO-3H-PTERIDIN-4-ONE	1.25	2.7.6.3	2003	Dynamic Roles of Arginine Residues 82 and 92 of Escherichia coli 6-Hydroxymethyl-7,8-dihydropterin Pyrophosphokinase: Crystallographic Studies	Biochemistry	42	1573	12578370
1IM6	Escherichia coli		1.74	2.7.6.3	2003	Dynamic Roles of Arginine Residues 82 and 92 of Escherichia coli 6-Hydroxymethyl-7,8-dihydropterin Pyrophosphokinase: Crystallographic Studies	Biochemistry	42	1573	12578370
1KBR	Escherichia coli		1.55	2.7.6.3	2003	Dynamic Roles of Arginine Residues 82 and 92 of Escherichia coli 6-Hydroxymethyl-7,8-dihydropterin Pyrophosphokinase: Crystallographic Studies	Biochemistry	42	1573	12578370
1RTZ	Escherichia coli		1.33	2.7.6.3	2004	Essential Roles of a Dynamic Loop in the Catalysis of 6-Hydroxymethyl-7,8-dihydropterin Pyrophosphokinase.	Biochemistry	43	1469	14769023
1RU1	Escherichia coli	DIPHOSPHOMETHYLPHOSPHONIC ACID ADENOSYL ESTER; 2-AMINO-6-HYDROXYMETHYL-7,8-DIHYDRO-3H-PTERIDIN-4-ONE	1.4	2.7.6.3	2004	Essential Roles of a Dynamic Loop in the Catalysis of 6-Hydroxymethyl-7,8-dihydropterin Pyrophosphokinase.	Biochemistry	43	1469	14769023
1RU2	Escherichia coli	DIPHOSPHOMETHYLPHOSPHONIC ACID ADENOSYL ESTER; 6-HYDROXYMETHYLPTERIN	1.48	2.7.6.3	2004	Essential Roles of a Dynamic Loop in the Catalysis of 6-Hydroxymethyl-7,8-dihydropterin Pyrophosphokinase.	Biochemistry	43	1469	14769023
1TMJ	Escherichia coli		1.45	2.7.6.3	2005	Is the Critical Role of Loop 3 of Escherichia coli 6-Hydroxymethyl-7,8-dihydropterin Pyrophosphokinase in Catalysis Due to Loop-3 Residues Arginine-84 and Tryptophan-89? Site-Directed Mutagenesis, Biochemical, and Crystallographic Studies.	Biochemistry	44	8590	15952765
1TMM	Escherichia coli	DIPHOSPHOMETHYLPHOSPHONIC ACID ADENOSYL ESTER; DIPHOSPHOMETHYLPHOSPHONIC ACID ADENOSYL ESTER	1.25	2.7.6.3	2005	Is the Critical Role of Loop 3 of Escherichia coli 6-Hydroxymethyl-7,8-dihydropterin Pyrophosphokinase in Catalysis Due to Loop-3 Residues Arginine-84 and Tryptophan-89? Site-Directed Mutagenesis, Biochemical, and Crystallographic Studies.	Biochemistry	44	8590	15952765
3IP0	Escherichia coli	DIPHOSPHOMETHYLPHOSPHONIC ACID ADENOSYL ESTER, 6-HYDROXYMETHYLPTERIN, 6-CARBOXYPTERIN	0.89	2.7.6.3	2003	Dynamic roles of arginine residues 82 and 92 of Escherichia coli 6-hydroxymethyl-7,8-dihydroptein pyrophosphokinase: Crystallographic studies	Biochemistry	42	1573	12578370
3UD5	Escherichia coli	5'-S-[1-(2-{[(2-AMINO-4-OXO-3,4-DIHYDROPTERIDIN-6-YL)METHYL]AMINO}ETHYL)PIPERIDIN-4-YL]-5'-THIOADENOSINE	2	2.7.6.3	2012	Bisubstrate analogue inhibitors of 6-hydroxymethyl-7,8-dihydropterin pyrophosphokinase: New design with improved properties.	Bioorg.Med.Chem.	20	47	22169600
3UDE	Escherichia coli	5'-S-[1-(2-{[(2-AMINO-7,7-DIMETHYL-4-OXO-3,4,7,8-TETRAHYDROPTERIDIN-6-YL)METHYL]AMINO}ETHYL)PIPERIDIN-4-YL]-5'-THIOADENOSINE	1.88	2.7.6.3	2012	Bisubstrate analogue inhibitors of 6-hydroxymethyl-7,8-dihydropterin pyrophosphokinase: New design with improved properties.	Bioorg.Med.Chem.	20	47	22169600
3UDV	Escherichia coli	5'-S-[1-(2-{[(2-AMINO-7,7-DIMETHYL-4-OXO-3,4,7,8-TETRAHYDROPTERIDIN-6-YL)CARBONYL]AMINO}ETHYL)PIPERIDIN-4-YL]-5'-THIOADENOSINE	1.88	2.7.6.3	2012	Bisubstrate analogue inhibitors of 6-hydroxymethyl-7,8-dihydropterin pyrophosphokinase: New design with improved properties.	Bioorg.Med.Chem.	20	47	22169600
4F7V	Escherichia coli	5'-{[2-({N-[(2-AMINO-7,7-DIMETHYL-4-OXO-3,4,7,8-TETRAHYDROPTERIDIN-6-YL)CARBONYL]GLYCYL}AMINO)ETHYL]SULFONYL}-5'-DEOXYADENOSINE	1.73	2.7.6.3	2012	Bisubstrate analog inhibitors of 6-hydroxymethyl-7,8-dihydropterin pyrophosphokinase: New lead exhibits a distinct binding mode.	Bioorg.Med.Chem.	20	4303	22727779
1DY3	ESCHERICHIA COLI	7,8-DIHYDRO-6-HYDROXYMETHYL-7-METHYL-7-[2-PHENYLETHYL]-PTERIN, ADENOSINE-5'-TRIPHOSPHATE	2	2.7.6.3	1999	2.0A X-Ray Structure of the Ternary Complex of 7,8-Dihydro-6-Hydroxymethylpterinpyrophosphokinase from Escherichia Coli with ATP and a Substrate Analogue	FEBS Lett.	456	49	10452528
1EQ0	Escherichia coli			2.7.6.3	2001	Unusual conformational changes in 6-hydroxymethyl-7,8-dihydropterin pyrophosphokinase as revealed by X-ray crystallography and NMR.	J.Biol.Chem.	276	40274	11546767
1EQM	Escherichia coli	ADENOSINE-5'-DIPHOSPHATE	1.5	2.7.6.3	2001	Unusual conformational changes in 6-hydroxymethyl-7,8-dihydropterin pyrophosphokinase as revealed by X-ray crystallography and NMR.	J.Biol.Chem.	276	40274	11546767
1EX8	Escherichia coli	6-(ADENOSINE TETRAPHOSPHATE-METHYL)-7,8-DIHYDROPTERIN	1.85	2.7.6.3	2001	Bisubstrate analogue inhibitors of 6-hydroxymethyl-7,8-dihydropterin pyrophosphokinase: synthesis and biochemical and crystallographic studies.	J.Med.Chem.	44	1364	11311059
1Q0N	Escherichia coli	DIPHOSPHOMETHYLPHOSPHONIC ACID ADENOSYL ESTER; 2-AMINO-6-HYDROXYMETHYL-7,8-DIHYDRO-3H-PTERIDIN-4-ONE	1.25	2.7.6.3	2000	Catalytic Center Assembly of Hppk as Revealed by the Crystal Structure of a Ternary Complex at 1.25 A Resolution	Structure	8	1049	11080626
1RAO	Escherichia coli	6-HYDROXYMETHYLPTERIN-DIPHOSPHATE	1.56	2.7.6.3	2004	Reaction trajectory of pyrophosphoryl transfer catalyzed by 6-hydroxymethyl-7,8-dihydropterin pyrophosphokinase.	Structure	12	467	15016362
1RB0	Escherichia coli	6-HYDROXYMETHYLPTERIN-DIPHOSPHATE	1.35	2.7.6.3	2004	Reaction trajectory of pyrophosphoryl transfer catalyzed by 6-hydroxymethyl-7,8-dihydropterin pyrophosphokinase.	Structure	12	467	15016362
1HKA	Escherichia coli		1.5	2.7.6.3	1999	Crystal structure of 6-hydroxymethyl-7,8-dihydropterin pyrophosphokinase, a potential target for the development of novel antimicrobial agents.	Structure Fold.Des.	7	489	10378268
2F63	Escherichia coli			2.7.6.3	To be Published	Solution structure of HPPK in complex with inhibitor analogs AMPCPP and HP-1
2F65	Escherichia coli			2.7.6.3	To be Published	Solution structure of HPPK in complex with inhibitor analog AMPCPP
3HSD	Escherichia coli		1.65	2.7.6.3	To be Published	Pterin-binding site mutation Y53A, N55A or F123A and activity of E. coli HPPK.
3HSG	Escherichia coli	DIPHOSPHOMETHYLPHOSPHONIC ACID ADENOSYL ESTER	1.14	2.7.6.3	To be Published	Pterin-binding site mutation Y53A, N55A or F123A and activity of E. coli HPPK
3HSJ	Escherichia coli		1.18	2.7.6.3	To be Published	Pterin-binding site mutation Y53A, N55A or F123A and activity of E. coli HPPK
3HSZ	Escherichia coli	2-AMINO-2-HYDROXYMETHYL-PROPANE-1,3-DIOL	1.4	2.7.6.3	To be Published	Pterin-binding site mutation Y53A, N55A or F123A and activity of E. coli HPPK
3HT0	Escherichia coli	DIPHOSPHOMETHYLPHOSPHONIC ACID ADENOSYL ESTER	1.4	2.7.6.3	To be Published	Pterin-binding site mutation Y53A, N55A or F123A and activity of E. coli HPPK
3ILI	Escherichia coli	DIPHOSPHOMETHYLPHOSPHONIC ACID ADENOSYL ESTER, 2-AMINO-2-HYDROXYMETHYL-PROPANE-1,3-DIOL	1.45	2.7.6.3	To be Published	Structural and functional roles of residues D95 and D97 in E. coli HPPK
3ILO	Escherichia coli	DIPHOSPHOMETHYLPHOSPHONIC ACID ADENOSYL ESTER, 2-AMINO-6-HYDROXYMETHYL-7,8-DIHYDRO-3H-PTERIDIN-4-ONE	1.1	2.7.6.3	To be Published	Structural and functional roles of residues D95 and D97 in E. coli HPPK
3KUE	Escherichia coli		1.54	2.7.6.3	To be Published	Roles of residues E77 and H115 in E. coli HPPK
3KUG	Escherichia coli		2	2.7.6.3	To be Published	Roles of residues E77 and H115 in E. coli HPPK
3KUH	Escherichia coli	DIPHOSPHOMETHYLPHOSPHONIC ACID ADENOSYL ESTER, MINO-6-HYDROXYMETHYL-7,8-DIHYDRO-3H-PTERIDIN-4-ONE	1.35	2.7.6.3	To be Published	Roles of residues E77 and H115 in E. coli HPPK
3HCX	Escherichia coli K-12	2-AMINO-2-HYDROXYMETHYL-PROPANE-1,3-DIOL	1.75	2.7.6.3	To be Published	Role of loop coupling in enzymatic catalysis and conformational dynamics
3HD1	Escherichia coli K-12	DIPHOSPHOMETHYLPHOSPHONIC ACID ADENOSYL ESTER	1.3	2.7.6.3	To be Published	Role of loop coupling in enzymatic catalysis and conformational dynamics
3HD2	Escherichia coli K-12	DIPHOSPHOMETHYLPHOSPHONIC ACID ADENOSYL ESTER, PTERINE	1.1	2.7.6.3	To be Published	Role of loop coupling in enzymatic catalysis and conformational dynamics
1CBK	Haemophilus influenzae	7,8-DIHYDRO-7,7-DIMETHYL-6-HYDROXYPTERIN	2.02	2.7.6.3	1999	The structure and function of the 6-hydroxymethyl-7,8-dihydropterin pyrophosphokinase from Haemophilus influenzae.	J.Mol.Biol.	287	211	10080886
2BMB	SACCHAROMYCES CEREVISIAE	PTERIN-6-YL-METHYL-MONOPHOSPHATE	2.3	2.7.6.3	2005	The Three-Dimensional Structure of the Bifunctional 6-Hydroxymethyl-7,8-Dihydropterin Pyrophosphokinase/Dihydropteroate Synthase of Saccharomyces Cerevisiae	J.Mol.Biol.	348	655	15826662
3QBC	Staphylococcus aureus	2-AMINO-8-SULFANYL-1,9-DIHYDRO-6H-PURIN-6-ONE	1.65	2.7.6.3	2012	Structure of S. aureus HPPK and the discovery of a new substrate site inhibitor	Plos One	7	e29444	22276115
2CG8	STREPTOCOCCUS PNEUMONIAE		2.9	2.7.6.3	2006	Crystal Structure of the Bifunctional Dihydroneopterin Aldolase/6-Hydroxymethyl-7,8-Dihydropterin Pyrophosphokinase from Streptococcus Pneumoniae.	J.Mol.Biol.	360	644	16781731
2QX0	Yersinia pestis	DIPHOSPHOMETHYLPHOSPHONIC ACID ADENOSYL ESTER; 2-AMINO-6-HYDROXYMETHYL-7,8-DIHYDRO-3H-PTERIDIN-4-ONE	1.8	2.7.6.3	2007	Structure and activity of Yersinia pestis 6-hydroxymethyl-7,8-dihydropterin pyrophosphokinase as a novel target for the development of antiplague therapeutics.	Acta Crystallogr.,Sect.D	63	1169	18007032
5. DHPS
1TWS	Bacillus anthracis		2.00	2.5.1.15	2004	Crystal Structure of 7,8-Dihydropteroate Synthase from Bacillus anthracis; Mechanism and Novel Inhibitor Design.	STRUCTURE	12	1705	15341734
1TWW	Bacillus anthracis	6-HYDROXYMETHYLPTERIN-DIPHOSPHATE	2.50	2.5.1.15	2004	Crystal Structure of 7,8-Dihydropteroate Synthase from Bacillus anthracis; Mechanism and Novel Inhibitor Design.	STRUCTURE	12	1705	15341734
1TWZ	Bacillus anthracis	PTERIN-6-YL-METHYL-MONOPHOSPHATE	2.75	2.5.1.15	2004	Crystal Structure of 7,8-Dihydropteroate Synthase from Bacillus anthracis; Mechanism and Novel Inhibitor Design.	STRUCTURE	12	1705	15341734
1TX0	Bacillus anthracis	PTEROIC ACID	2.15	2.5.1.15	2004	Crystal Structure of 7,8-Dihydropteroate Synthase from Bacillus anthracis; Mechanism and Novel Inhibitor Design.	STRUCTURE	12	1705	15341734
1TX2	Bacillus anthracis	6-METHYLAMINO-5-NITROISOCYTOSINE	1.83	2.5.1.15	2004	Crystal Structure of 7,8-Dihydropteroate Synthase from Bacillus anthracis; Mechanism and Novel Inhibitor Design.	STRUCTURE	12	1705	15341734
3TYA	Bacillus anthracis	7,8-DIHYDROPTEROATE	2.61	2.5.1.15	2012	Catalysis and sulfa drug resistance in dihydropteroate synthase.	Science	335	1110	22383850
3TYB	Bacillus anthracis	P-HYDROXYBENZOIC ACID, 2-AMINO-6-METHYLIDENE-6,7-DIHYDROPTERIDIN-4(3H)-ONE	2.60	2.5.1.15	2012	Catalysis and sulfa drug resistance in dihydropteroate synthase.	Science	335	1110	22383850
3TYC	Bacillus anthracis	2-AMINO-6-METHYLIDENE-6,7-DIHYDROPTERIDIN-4(3H)-ONE	2.30	2.5.1.15	2012	Catalysis and sulfa drug resistance in dihydropteroate synthase.	Science	335	1110	22383850
3TYD	Bacillus anthracis	PYROPHOSPHATE 2-, 2-AMINO-6-METHYLIDENE-6,7-DIHYDROPTERIDIN-4(3H)-ONE	2.50	2.5.1.15	2012	Catalysis and sulfa drug resistance in dihydropteroate synthase.	Science	335	1110	22383850
3TYE	Bacillus anthracis	4-{[(2-AMINO-4-OXO-3,4,7,8-TETRAHYDROPTERIDIN-6-YL)METHYL]AMINO}-N-(1,3-THIAZOL-2-YL)BENZENESULFONAMIDE	2.30	2.5.1.15	2012	Catalysis and sulfa drug resistance in dihydropteroate synthase.	Science	335	1110	22383850
3V5O	Bacillus anthracis	SULFATE ION	2.50	2.5.1.15	2012	Catalysis and sulfa drug resistance in dihydropteroate synthase.	Science	335	1110	22383850
4D8A	Bacillus anthracis	METHYL (3R)-3-(7-AMINO-4,5-DIOXO-1,4,5,6-TETRAHYDROPYRIMIDO[4,5-C]PYRIDAZIN-3-YL)BUTANOATE	2.18	2.5.1.15	2012	Structure-Based Design of Novel Pyrimido[4,5-c]pyridazine Derivatives as Dihydropteroate Synthase Inhibitors with Increased Affinity.	Chemmedchem	7	861	22416048
4D8Z	Bacillus anthracis	(3R)-3-(7-AMINO-4,5-DIOXO-1,4,5,6-TETRAHYDROPYRIMIDO[4,5-C]PYRIDAZIN-3-YL)BUTANOIC ACID	2.20	2.5.1.15	2012	Structure-Based Design of Novel Pyrimido[4,5-c]pyridazine Derivatives as Dihydropteroate Synthase Inhibitors with Increased Affinity.	Chemmedchem	7	861	22416048
4D9P	Bacillus anthracis	(3R)-3-(7-AMINO-1-METHYL-4,5-DIOXO-1,4,5,6-TETRAHYDROPYRIMIDO[4,5-C]PYRIDAZIN-3-YL)BUTANOIC ACID	2.26	2.5.1.15	2012	Structure-Based Design of Novel Pyrimido[4,5-c]pyridazine Derivatives as Dihydropteroate Synthase Inhibitors with Increased Affinity.	Chemmedchem	7	861	22416048
4DAF	Bacillus anthracis	(2R)-2-(7-AMINO-4,5-DIOXO-1,4,5,6-TETRAHYDROPYRIMIDO[4,5-C]PYRIDAZIN-3-YL)PROPANOIC ACID	2.50	2.5.1.15	2012	Structure-Based Design of Novel Pyrimido[4,5-c]pyridazine Derivatives as Dihydropteroate Synthase Inhibitors with Increased Affinity.	Chemmedchem	7	861	22416048
4DAI	Bacillus anthracis	(7-AMINO-4,5-DIOXO-1,4,5,6-TETRAHYDROPYRIMIDO[4,5-C]PYRIDAZIN-3-YL)ACETIC ACID	2.50	2.5.1.15	2012	Structure-Based Design of Novel Pyrimido[4,5-c]pyridazine Derivatives as Dihydropteroate Synthase Inhibitors with Increased Affinity.	Chemmedchem	7	861	22416048
4DB7	Bacillus anthracis	3-(7-AMINO-4,5-DIOXO-1,4,5,6-TETRAHYDROPYRIMIDO[4,5-C]PYRIDAZIN-3-YL)PROPANOIC ACID	2.50	2.5.1.15	2012	Structure-Based Design of Novel Pyrimido[4,5-c]pyridazine Derivatives as Dihydropteroate Synthase Inhibitors with Increased Affinity.	Chemmedchem	7	861	22416048
3H21	Bacillus anthracis str. A2012	(2R)-2-(7-AMINO-1-METHYL-4,5-DIOXO-1,4,5,6-TETRAHYDROPYRIMIDO[4,5-C]PYRIDAZIN-3-YL)PROPANOIC ACID	2.32	2.5.1.15	2010	Structural studies of pterin-based inhibitors of dihydropteroate synthase.	J.Med.Chem.	53	166	19899766
3H22	Bacillus anthracis str. A2012	2,6-DIAMINO-5-NITROSOPYRIMIDIN-4(3H)-ONE	2.40	2.5.1.15	2010	Structural studies of pterin-based inhibitors of dihydropteroate synthase.	J.Med.Chem.	53	166	19899766
3H23	Bacillus anthracis str. A2012	4-{3-[(2-AMINO-5-NITROSO-6-OXO-1,6-DIHYDROPYRIMIDIN-4-YL)AMINO]PROPOXY}BENZOIC ACID	2.20	2.5.1.15	2010	Structural studies of pterin-based inhibitors of dihydropteroate synthase.	J.Med.Chem.	53	166	19899766
3H24	Bacillus anthracis str. A2012	2-AMINO-8-SULFANYL-1,9-DIHYDRO-6H-PURIN-6-ONE	2.50	2.5.1.15	2010	Structural studies of pterin-based inhibitors of dihydropteroate synthase.	J.Med.Chem.	53	166	19899766
3H26	Bacillus anthracis str. A2012	2-AMINO-8-METHYL-4-OXO-3,4,7,8-TETRAHYDROPTERIDINE-6-CARBOXYLIC ACID	2.50	2.5.1.15	2010	Structural studies of pterin-based inhibitors of dihydropteroate synthase.	J.Med.Chem.	53	166	19899766
3H2A	Bacillus anthracis str. A2012	2,6-DIAMINO-5-NITROPYRIMIDIN-4(3H)-ONE	2.40	2.5.1.15	2010	Structural studies of pterin-based inhibitors of dihydropteroate synthase.	J.Med.Chem.	53	166	19899766
3H2C	Bacillus anthracis str. A2012	1H-IMIDAZO[4,5-D]PYRIDAZINE-4,7-DIAMINE	2.60	2.5.1.15	2010	Structural studies of pterin-based inhibitors of dihydropteroate synthase.	J.Med.Chem.	53	166	19899766
3H2E	Bacillus anthracis str. A2012	1,3-DIMETHYL-2,4,7-TRIOXO-1,2,3,4,7,8-HEXAHYDROPTERIDINE-6-CARBALDEHYDE	2.00	2.5.1.15	2010	Structural studies of pterin-based inhibitors of dihydropteroate synthase.	J.Med.Chem.	53	166	19899766
3H2F	Bacillus anthracis str. A2012	2-AMINO-8-METHYL-7,8-DIHYDROPTERIDIN-4(3H)-ONE	2.20	2.5.1.15	2010	Structural studies of pterin-based inhibitors of dihydropteroate synthase.	J.Med.Chem.	53	166	19899766
3H2M	Bacillus anthracis str. A2012	2-AMINO-6-(2-HYDROXY-2-METHYLPROPYL)-8-METHYL-7,8-DIHYDROPTERIDIN-4(3H)-ONE	2.31	2.5.1.15	2010	Structural studies of pterin-based inhibitors of dihydropteroate synthase.	J.Med.Chem.	53	166	19899766
3H2N	Bacillus anthracis str. A2012	(6R)-2-AMINO-6-METHYL-5,6,7,8-TETRAHYDROPTERIDIN-4(3H)-ONE	2.40	2.5.1.15	2010	Structural studies of pterin-based inhibitors of dihydropteroate synthase.	J.Med.Chem.	53	166	19899766
3H2O	Bacillus anthracis str. A2012	4-{[2-(2-AMINO-4-OXO-3,4,7,8-TETRAHYDROPTERIDIN-6-YL)ETHYL]AMINO}BENZOIC ACID	2.70	2.5.1.15	2010	Structural studies of pterin-based inhibitors of dihydropteroate synthase.	J.Med.Chem.	53	166	19899766
2Y5J	BURKHOLDERIA CENOCEPACIA	1,2-ETHANEDIOL	2.33	2.5.1.15	2011	Crystal Structures of Burkholderia Cenocepacia Dihydropteroate Synthase in the Apo-Form and Complexed with the Product 7,8-Dihydropteroate.	Bmc Struct.Biol.	11	21	21554707
2Y5S	BURKHOLDERIA CENOCEPACIA	7,8-DIHYDROPTEROATE	1.95	2.5.1.15	2011	Crystal Structures of Burkholderia Cenocepacia Dihydropteroate Synthase in the Apo-Form and Complexed with the Product 7,8-Dihydropteroate.	Bmc Struct.Biol.	11	21	21554707
3TR9	Coxiella burnetii	PTEROIC ACID	1.89	2.5.1.15		Structure of a dihydropteroate synthase (folP) in complex with pteroic acid from Coxiella burnetii	To be Published
1AJ0	Escherichia coli	2-AMINO-6-HYDROXYMETHYL-7,8-DIHYDRO-3H-PTERIDIN-4-ONE, SULFANILAMIDE	2.00	2.5.1.15	1997	Crystal structure of the anti-bacterial sulfonamide drug target dihydropteroate synthase.	Nat.Struct.Mol.Biol.	4	490	9187658
1AJ2	Escherichia coli	[7,8-DIHYDRO-PTERIN-6-YL METHANYL]-PHOSPHONOPHOSPHATE	2.00	2.5.1.15	1997	Crystal structure of the anti-bacterial sulfonamide drug target dihydropteroate synthase.	Nat.Struct.Mol.Biol.	4	490	9187658
1AJZ	Escherichia coli	SULFATE ION	2.00	2.5.1.15	1997	Crystal structure of the anti-bacterial sulfonamide drug target dihydropteroate synthase.	Nat.Struct.Mol.Biol.	4	490	9187658
1EYE	Mycobacterium tuberculosis H37Rv	PTERIN-6-YL-METHYL-MONOPHOSPHATE	1.70	2.5.1.15	2000	Crystal structure of Mycobacterium tuberculosis 7,8-dihydropteroate synthase in complex with pterin monophosphate: new insight into the enzymatic mechanism and sulfa-drug action.	J.Mol.Biol.	302	1193	11007651
1AD1	Staphylococcus aureus	2-AMINO-2-HYDROXYMETHYL-PROPANE-1,3-DIOL	2.20	2.5.1.15	1997	Structure and function of the dihydropteroate synthase from Staphylococcus aureus.	J.Mol.Biol.	268	21	9149138
1AD4	Staphylococcus aureus	6-HYDROXYMETHYLPTERIN-DIPHOSPHATE	2.40	2.5.1.15	1997	Structure and function of the dihydropteroate synthase from Staphylococcus aureus.	J.Mol.Biol.	268	21	9149138
4HB7	Staphylococcus aureus	1,2-ETHANEDIOL	1.95	2.5.1.15		The Structure of Dihydropteroate Synthase from Staphylococcus aureus subsp. aureus Mu50.	TO BE PUBLISHED
2VEF	STREPTOCOCCUS PNEUMONIAE	PHOSPHATE ION	1.80	2.5.1.15	2008	Dihydropteroate Synthase from Streptococcus Pneumoniae: Structure, Ligand Recognition and Mechanism of Sulfonamide Resistance.	Biochem.J.	412	379	18321242
2VEG	STREPTOCOCCUS PNEUMONIAE	PTERIN-6-YL-METHYL-MONOPHOSPHATE	2.40	2.5.1.15	2008	Dihydropteroate Synthase from Streptococcus Pneumoniae: Structure, Ligand Recognition and Mechanism of Sulfonamide Resistance.	Biochem.J.	412	379	18321242
2DQW	Thermus thermophilus		1.65	2.5.1.15		Crystal Structure of Dihydropteroate Synthase (FolP) from Thermus thermophilus HB8	To be Published
2DZA	Thermus thermophilus	4-AMINOBENZOIC ACID	1.90	2.5.1.15		Crystal Structure of Dihydropteroate Synthase (FolP) from Thermus thermophilus HB8	To be Published
2DZB	Thermus thermophilus	6-HYDROXYMETHYLPTERIN-DIPHOSPHATE	1.90	2.5.1.15		Crystal Structure of Dihydropteroate Synthase (FolP) from Thermus thermophilus HB8	To be Published
3TYU	Yersinia pestis	PTEROIC ACID	2.70	2.5.1.15	2012	Catalysis and sulfa drug resistance in dihydropteroate synthase.	Science	335	1110	22383850
3TYZ	Yersinia pestis	PYROPHOSPHATE 2-, 2-AMINO-6-METHYLIDENE-6,7-DIHYDROPTERIDIN-4(3H)-ONE, 4-AMINOBENZOIC ACID	2.07	2.5.1.15	2012	Catalysis and sulfa drug resistance in dihydropteroate synthase.	Science	335	1110	22383850
3TZF	Yersinia pestis	6-HYDROXYMETHYLPTERIN-DIPHOSPHATE, SULFAMETHOXAZOLE	2.10	2.5.1.15	2012	Catalysis and sulfa drug resistance in dihydropteroate synthase.	Science	335	1110	22383850
3TZN	Yersinia pestis		2.08	2.5.1.15	2012	Catalysis and sulfa drug resistance in dihydropteroate synthase.	Science	335	1110	22383850
6. DHFS
1W78	ESCHERICHIA COLI	ADENOSINE-5'-DIPHOSPHATE, PHOSPHORYLATED DIHYDROPTEROATE	1.82	6.3.2.12	2005	Escherichia Coli Folc Structure Reveals an Unexpected Dihydrofolate Binding Site Providing an Attractive Target for Anti-Microbial Therapy	J.Biol.Chem.	280	18916	15705579
1W7K	ESCHERICHIA COLI	ADENOSINE-5'-DIPHOSPHATE	2.10	6.3.2.12	2005	Escherichia Coli Folc Structure Reveals an Unexpected Dihydrofolate Binding Site Providing an Attractive Target for Anti-Microbial Therapy	J.Biol.Chem.	280	18916	15705579
3PYZ	Yersinia pestis	PHOSPHOAMINOPHOSPHONIC ACID-ADENYLATE ESTER	2.10	6.3.2.12 + 6.3.2.17	TO BE PUBLISHED	Crystal structure of bifunctional folylpolyglutamate synthase/dihydrofolate synthase complexed with AMPpnp and Mn ion from Yersinia pestis c092
3N2A	Yersinia pestis	ADENOSINE-5'-DIPHOSPHATE	1.90	6.3.2.12 + 6.3.2.17	TO BE PUBLISHED	Crystal structure of bifunctional folylpolyglutamate synthase/dihydrofolate synthase from Yersinia pestis CO92
7. DHFR (~320 structures total; here limited to only bacterial)
2KGK	Bacillus anthracis	5-[3-(2,5-DIMETHOXYPHENYL)PROP-1-YN-1-YL]-6-ETHYLPYRIMIDINE-2,4-DIAMINE, NADP		1.5.1.3	2009	The solution structure of Bacillus anthracis dihydrofolate reductase yields insight into the analysis of structure-activity relationships for novel inhibitors.	Biochemistry	48	4100	19323450
3E0B	Bacillus anthracis	5-[3-(2,5-DIMETHOXYPHENYL)PROP-1-YN-1-YL]-6-ETHYLPYRIMIDINE-2,4-DIAMINE	2.25	1.5.1.3	2008	Synthetic and Crystallographic Studies of a New Inhibitor Series Targeting Bacillus anthracis Dihydrofolate Reductase	J.Med.Chem.	51	7532	19007108
3FL8	Bacillus anthracis	5-(3,4-DIMETHOXY-5-{(1E)-3-OXO-3-[(1S)-1-PROPYLPHTHALAZIN-2(1H)-YL]PROP-1-EN-1-YL}BENZYL)PYRIMIDINE-2,4-DIAMINE	2.29	1.5.1.3	2009	Crystal structure of Bacillus anthracis dihydrofolate reductase with the dihydrophthalazine-based trimethoprim derivative RAB1 provides a structural explanation of potency and selectivity.	Antimicrob.Agents Chemother.	53	3065	19364848
3FL9	Bacillus anthracis	TRIMETHOPRIM	2.4	1.5.1.3	2009	Crystal structure of Bacillus anthracis dihydrofolate reductase with the dihydrophthalazine-based trimethoprim derivative RAB1 provides a structural explanation of potency and selectivity.	Antimicrob.Agents Chemother.	53	3065	19364848
3JVX	Bacillus anthracis	6-ETHYL-5-[3-(3,4,5-TRIMETHOXYPHENYL)PROP-1-YN-1-YL]PYRIMIDINE-2,4-DIAMINE, NADP	2.25	1.5.1.3	To be Published	Mutational Studies into Trimethoprim Resistance in Bacillus anthracis Dihydrofolate Reductase
3JW3	Bacillus anthracis	TRIMETHOPRIM, NADP	2.57	1.5.1.3	To be Published	Mutational Studies into Trimethoprim Resistance in Bacillus anthracis Dihydrofolate Reductase
3JW5	Bacillus anthracis	TRIMETHOPRIM, NADP	2.89	1.5.1.3	To be Published	Mutational Studies into Trimethoprim Resistance in Bacillus anthracis Dihydrofolate Reductase
3JWC	Bacillus anthracis	6-ETHYL-5-[3-(3,4,5-TRIMETHOXYPHENYL)PROP-1-YN-1-YL]PYRIMIDINE-2,4-DIAMINE, NADP	2.57	1.5.1.3	2010	Targeted Mutations in Bacillus anthracis Dihydrofolate Reductase Condense Complex Structure-Activity Relationships	J.Med.Chem.
3JWF	Bacillus anthracis	(1R)-3-(2,4-DIAMINO-6-METHYLPYRIMIDIN-5-YL)-1-(3,4,5-TRIMETHOXYPHENYL)PROP-2-YN-1-OL, NADP	2.57	1.5.1.3	2010	Targeted Mutations in Bacillus anthracis Dihydrofolate Reductase Condense Complex Structure-Activity Relationships	J.Med.Chem.
3JWK	Bacillus anthracis	5-[(3S)-3-METHOXY-3-(3,4,5-TRIMETHOXYPHENYL)PROP-1-YN-1-YL]-6-METHYLPYRIMIDINE-2,4-DIAMINE, NADP	2.08	1.5.1.3	2010	Targeted Mutations in Bacillus anthracis Dihydrofolate Reductase Condense Complex Structure-Activity Relationships	J.Med.Chem.
3JWM	Bacillus anthracis	5-[(3S)-3-METHOXY-3-(3,4,5-TRIMETHOXYPHENYL)PROP-1-YN-1-YL]-6-METHYLPYRIMIDINE-2,4-DIAMINE, NADP	2.57	1.5.1.3	To be Published	Mutational Studies into Trimethoprim Resistance in Bacillus anthracis Dihydrofolate Reductase
3S9U	Bacillus anthracis	6-ETHYL-5-[3-(4-METHOXYBIPHENYL-3-YL)PROP-1-YN-1-YL]PYRIMIDINE-2,4-DIAMINE, NADP	1.9	1.5.1.3	To be Published	Structure-Activity Studies of Heterocyclic Propargyl-linked TMP Analogs Targeting Bacillus anthracis Dihydrofolate Reductase
3SA1	Bacillus anthracis	6-ETHYL-5-{3-[2-METHOXY-5-(PYRIDIN-4-YL)PHENYL]PROP-1-YN-1-YL}PYRIMIDINE-2,4-DIAMINE, NADP	2.5	1.5.1.3	To be Published	SAR studies of heterocyclic propargyl-linked TMP analogs to Bacillus dihydrofolate reductase
3SA2	Bacillus anthracis	6-ETHYL-5-[3-(5-METHOXYBIPHENYL-3-YL)PROP-1-YN-1-YL]PYRIMIDINE-2,4-DIAMINE, NADP	2.25	1.5.1.3	To be Published	SAR studies of heterocyclic propargyl-linked TMP analogs to Bacillus dihydrofolate reductase
3SAI	Bacillus anthracis	6-ETHYL-5-{3-[3-METHOXY-5-(PYRIDIN-4-YL)PHENYL]PROP-1-YN-1-YL}PYRIMIDINE-2,4-DIAMINE, NADP	2.25	1.5.1.3	To be Published	SAR studies of heterocyclic propargyl-linked TMP analogs targeting Bacillus dihydrofolate reductase
4ELB	Bacillus anthracis	(2E)-3-{5-[(2,4-DIAMINOPYRIMIDIN-5-YL)METHYL]-2,3-DIMETHOXYPHENYL}-1-[(1S)-1-PHENYLPHTHALAZIN-2(1H)-YL]PROP-2-EN-1-ONE	2.6	1.5.1.3	2013	Structure-activity relationship for enantiomers of potent inhibitors of B. anthracis dihydrofolate reductase.	Biochim.Biophys.Acta	1834	46	22999981
4ELE	Bacillus anthracis	(2E)-3-{5-[(2,4-DIAMINOPYRIMIDIN-5-YL)METHYL]-2,3-DIMETHOXYPHENYL}-1-[(1S)-1-(PROPAN-2-YL)PHTHALAZIN-2(1H)-YL]PROP-2-EN-1-ONE	2.35	1.5.1.3	2013	Structure-activity relationship for enantiomers of potent inhibitors of B. anthracis dihydrofolate reductase.	Biochim.Biophys.Acta	1834	46	22999981
4ELF	Bacillus anthracis	(2E)-3-{5-[(2,4-DIAMINOPYRIMIDIN-5-YL)METHYL]-2,3-DIMETHOXYPHENYL}-1-[(1S)-1-(3,3,3-TRIFLUOROPROPYL)PHTHALAZIN-2(1H)-YL]PROP-2-EN-1-ONE	2.3	1.5.1.3	2013	Structure-activity relationship for enantiomers of potent inhibitors of B. anthracis dihydrofolate reductase.	Biochim.Biophys.Acta	1834	46	22999981
4ELG	Bacillus anthracis	(2E)-3-{5-[(2,4-DIAMINOPYRIMIDIN-5-YL)METHYL]-2,3-DIMETHOXYPHENYL}-1-[(1S)-1-(2-METHYLPROPYL)PHTHALAZIN-2(1H)-YL]PROP-2-EN-1-ONE	2.1	1.5.1.3	2013	Structure-activity relationship for enantiomers of potent inhibitors of B. anthracis dihydrofolate reductase.	Biochim.Biophys.Acta	1834	46	22999981
4ELH	Bacillus anthracis	(2E)-3-{5-[(2,4-DIAMINOPYRIMIDIN-5-YL)METHYL]-2,3-DIMETHOXYPHENYL}-1-[(1R)-1-(2-METHYLPROP-1-EN-1-YL)PHTHALAZIN-2(1H)-YL]PROP-2-EN-1-ONE	2.1	1.5.1.3	2013	Structure-activity relationship for enantiomers of potent inhibitors of B. anthracis dihydrofolate reductase.	Biochim.Biophys.Acta	1834	46	22999981
2QK8	Bacillus anthracis str.	METHOTREXATE	2.4	1.5.1.3	2007	Crystal structure of the anthrax drug target, Bacillus anthracis dihydrofolate reductase.	J.Med.Chem.	50	4374	17696333
3DAT	Bacillus anthracis str.	METHOTREXATE, NADP	2.3	1.5.1.3	2009	X-ray structure of the ternary MTX.NADPH complex of the anthrax dihydrofolate reductase: a pharmacophore for dual-site inhibitor design.	J.Struct.Biol.	166	162	19374017
3TQ8	Coxiella burnetii	TRIMETHOPRIM, NADPH	1.9	1.5.1.3	To be Published	Structure of the dihydrofolate reductase (folA) from Coxiella burnetii in complex with trimethoprim
3TQ9	Coxiella burnetii	METHOTREXATE, NADPH	2.3	1.5.1.3	To be Published	Structure of the dihydrofolate reductase (folA) from Coxiella burnetii in complex with methotrexate
3TQB	Coxiella burnetii	FOLIC ACID, NADPH	2.4	1.5.1.3	To be Published	Structure of the dihydrofolate reductase (folA) from Coxiella burnetii in complex with folate
1DDR	Escherichia coli	METHOTREXATE	2.45	1.5.1.3	1997	The effect of denaturants on protein structure.	Protein Sci.	6	1727	9260285
1DDS	Escherichia coli	METHOTREXATE	2.2	1.5.1.3	1997	The effect of denaturants on protein structure.	Protein Sci.	6	1727	9260285
1DHI	Escherichia coli	METHOTREXATE	1.9	1.5.1.3	1993	Long-range structural effects in a second-site revertant of a mutant dihydrofolate reductase.	Proc.Natl.Acad.Sci.USA	90	11753	8265622
1DHJ	Escherichia coli	METHOTREXATE	1.8	1.5.1.3	1993	Long-range structural effects in a second-site revertant of a mutant dihydrofolate reductase.	Proc.Natl.Acad.Sci.USA	90	11753	8265622
1DRA	Escherichia coli	METHOTREXATE	1.9	1.5.1.3	1991	Crystal structure of unliganded Escherichia coli dihydrofolate reductase. Ligand-induced conformational changes and cooperativity in binding.	Biochemistry	30	2227	1998681
1DRB	Escherichia coli	METHOTREXATE	1.96	1.5.1.3	1991	Crystal structure of unliganded Escherichia coli dihydrofolate reductase. Ligand-induced conformational changes and cooperativity in binding.	Biochemistry	30	2227	1998681
1DRE	Escherichia coli	METHOTREXATE, NADP	2.6	1.5.1.3	1997	Loop and subdomain movements in the mechanism of Escherichia coli dihydrofolate reductase: crystallographic evidence.	Biochemistry	36	586	9012674
1DYH	Escherichia coli	5-DEAZAFOLIC ACID, NADP	1.9	1.5.1.3	1995	Isomorphous crystal structures of Escherichia coli dihydrofolate reductase complexed with folate, 5-deazafolate, and 5,10-dideazatetrahydrofolate: mechanistic implications.	Biochemistry	34	2710	7873554
1DYI	Escherichia coli	FOLIC ACID	1.9	1.5.1.3	1995	Isomorphous crystal structures of Escherichia coli dihydrofolate reductase complexed with folate, 5-deazafolate, and 5,10-dideazatetrahydrofolate: mechanistic implications.	Biochemistry	34	2710	7873554
1DYJ	Escherichia coli	5,10-DIDEAZATETRAHYDROFOLIC ACID	1.85	1.5.1.3	1995	Isomorphous crystal structures of Escherichia coli dihydrofolate reductase complexed with folate, 5-deazafolate, and 5,10-dideazatetrahydrofolate: mechanistic implications.	Biochemistry	34	2710	7873554
1DYJ	Escherichia coli	5,10-DIDEAZATETRAHYDROFOLIC ACID	1.85	1.5.1.3	1995	Isomorphous crystal structures of Escherichia coli dihydrofolate reductase complexed with folate, 5-deazafolate, and 5,10-dideazatetrahydrofolate: mechanistic implications.	Biochemistry	34	2710	7873554
1JOL	Escherichia coli	5-FORMYL-6-HYDROFOLIC ACID	1.96	1.5.1.3	1996	Crystal structures of Escherichia coli dihydrofolate reductase complexed with 5-formyltetrahydrofolate (folinic acid) in two space groups: evidence for enolization of pteridine O4.	Biochemistry	35	7012	8679526
1JOM	Escherichia coli	5-FORMYL-6-HYDROFOLIC ACID	1.9	1.5.1.3	1996	Crystal structures of Escherichia coli dihydrofolate reductase complexed with 5-formyltetrahydrofolate (folinic acid) in two space groups: evidence for enolization of pteridine O4.	Biochemistry	35	7012	8679526
1RA1	Escherichia coli	NADP	1.9	1.5.1.3	1997	Loop and subdomain movements in the mechanism of Escherichia coli dihydrofolate reductase: crystallographic evidence.	Biochemistry	36	586	9012674
1RA2	Escherichia coli	FOLIC ACID, NADP	1.6	1.5.1.3	1997	Loop and subdomain movements in the mechanism of Escherichia coli dihydrofolate reductase: crystallographic evidence.	Biochemistry	36	586	9012674
1RA3	Escherichia coli	METHOTREXATE, NADP	1.8	1.5.1.3	1997	Loop and subdomain movements in the mechanism of Escherichia coli dihydrofolate reductase: crystallographic evidence.	Biochemistry	36	586	9012674
1RA8	Escherichia coli	2'-MONOPHOSPHOADENOSINE-5'-DIPHOSPHATE, FOLIC ACID	1.8	1.5.1.3	1997	Loop and subdomain movements in the mechanism of Escherichia coli dihydrofolate reductase: crystallographic evidence.	Biochemistry	36	586	9012674
1RA9	Escherichia coli	NADP NICOTINAMIDE-ADENINE-DINUCLEOTIDE PHOSPHATE	1.55	1.5.1.3	1997	Loop and subdomain movements in the mechanism of Escherichia coli dihydrofolate reductase: crystallographic evidence.	Biochemistry	36	586	9012674
1RB2	Escherichia coli	FOLIC ACID, NADP	2.1	1.5.1.3	1997	Loop and subdomain movements in the mechanism of Escherichia coli dihydrofolate reductase: crystallographic evidence.	Biochemistry	36	586	9012674
1RB3	Escherichia coli	METHOTREXATE, NADP	2.3	1.5.1.3	1997	Loop and subdomain movements in the mechanism of Escherichia coli dihydrofolate reductase: crystallographic evidence.	Biochemistry	36	586	9012674
1RC4	Escherichia coli	5,10-DIDEAZATETRAHYDROFOLIC ACID, NADP	1.9	1.5.1.3	1997	Loop and subdomain movements in the mechanism of Escherichia coli dihydrofolate reductase: crystallographic evidence.	Biochemistry	36	586	9012674
1RD7	Escherichia coli	FOLIC ACID	2.6	1.5.1.3	1997	Loop and subdomain movements in the mechanism of Escherichia coli dihydrofolate reductase: crystallographic evidence.	Biochemistry	36	586	9012674
1RE7	Escherichia coli	FOLIC ACID	2.6	1.5.1.3	1997	Loop and subdomain movements in the mechanism of Escherichia coli dihydrofolate reductase: crystallographic evidence.	Biochemistry	36	586	9012674
1RF7	Escherichia coli	DIHYDROFOLIC ACID	1.8	1.5.1.3	1997	Loop and subdomain movements in the mechanism of Escherichia coli dihydrofolate reductase: crystallographic evidence.	Biochemistry	36	586	9012674
1RG7	Escherichia coli	METHOTREXATE	2	1.5.1.3	1997	Loop and subdomain movements in the mechanism of Escherichia coli dihydrofolate reductase: crystallographic evidence.	Biochemistry	36	586	9012674
1RH3	Escherichia coli	METHOTREXATE, NADP	2.4	1.5.1.3	1997	Loop and subdomain movements in the mechanism of Escherichia coli dihydrofolate reductase: crystallographic evidence.	Biochemistry	36	586	9012674
1RX1	Escherichia coli	NADP	2	1.5.1.3	1997	Loop and subdomain movements in the mechanism of Escherichia coli dihydrofolate reductase: crystallographic evidence.	Biochemistry	36	586	9012674
1RX2	Escherichia coli	FOLIC ACID, NADP	1.8	1.5.1.3	1997	Loop and subdomain movements in the mechanism of Escherichia coli dihydrofolate reductase: crystallographic evidence.	Biochemistry	36	586	9012674
1RX3	Escherichia coli	METHOTREXATE, NADP	2.2	1.5.1.3	1997	Loop and subdomain movements in the mechanism of Escherichia coli dihydrofolate reductase: crystallographic evidence.	Biochemistry	36	586	9012674
1RX4	Escherichia coli	5,10-DIDEAZATETRAHYDROFOLIC ACID, NADP	2.2	1.5.1.3	1997	Loop and subdomain movements in the mechanism of Escherichia coli dihydrofolate reductase: crystallographic evidence.	Biochemistry	36	586	9012674
1RX5	Escherichia coli	5,10-DIDEAZATETRAHYDROFOLIC ACID, NADP	2.3	1.5.1.3	1997	Loop and subdomain movements in the mechanism of Escherichia coli dihydrofolate reductase: crystallographic evidence.	Biochemistry	36	586	9012674
1RX6	Escherichia coli	5,10-DIDEAZATETRAHYDROFOLIC ACID, NADP	2	1.5.1.3	1997	Loop and subdomain movements in the mechanism of Escherichia coli dihydrofolate reductase: crystallographic evidence.	Biochemistry	36	586	9012674
1RX7	Escherichia coli	FOLIC ACID	2.3	1.5.1.3	1997	Loop and subdomain movements in the mechanism of Escherichia coli dihydrofolate reductase: crystallographic evidence.	Biochemistry	36	586	9012674
1RX8	Escherichia coli	FOLIC ACID, NADP	2.8	1.5.1.3	1997	Loop and subdomain movements in the mechanism of Escherichia coli dihydrofolate reductase: crystallographic evidence.	Biochemistry	36	586	9012674
1RX9	Escherichia coli	NADP	1.9	1.5.1.3	1997	Loop and subdomain movements in the mechanism of Escherichia coli dihydrofolate reductase: crystallographic evidence.	Biochemistry	36	586	9012674
1TDR	Escherichia coli	METHOTREXATE	2.5	1.5.1.3	1995	Expression, characterization and crystallographic analysis of telluromethionyl dihydrofolate reductase.	Acta Crystallogr.,Sect.D	51	731	15299803
1VIE	Escherichia coli		1.7	1.5.1.3	1995	A plasmid-encoded dihydrofolate reductase from trimethoprim-resistant bacteria has a novel D2-symmetric active site.	Nat.Struct.Mol.Biol.	2	1018	7583655
1VIF	Escherichia coli	FOLIC ACID	1.8	1.5.1.3	1995	A plasmid-encoded dihydrofolate reductase from trimethoprim-resistant bacteria has a novel D2-symmetric active site.	Nat.Struct.Mol.Biol.	2	1018	7583655
2ANO	Escherichia coli	1-{[N-(1-IMINO-GUANIDINO-METHYL)]SULFANYLMETHYL}-3-TRIFLUOROMETHYL-BENZENE, NADP	2.68	1.5.1.3	2006	A 2.13 A Structure of E. coli Dihydrofolate Reductase Bound to a Novel Competitive Inhibitor Reveals a New Binding Surface Involving the M20 Loop Region	J.Med.Chem.	49	6977	17125251
2ANQ	Escherichia coli	1,4-BIS-{[N-(1-IMINO-1GUANIDINO-METHYL)]SULFANYLMETHYL}-3,6-DIMETHYL-BENZENE, NADP	2.13	1.5.1.3	2006	A 2.13 A Structure of E. coli Dihydrofolate Reductase Bound to a Novel Competitive Inhibitor Reveals a New Binding Surface Involving the M20 Loop Region	J.Med.Chem.	49	6977	17125251
2D0K	Escherichia coli	FOLIC ACID	1.9	1.5.1.3	2006	Evolutional Design of a Hyperactive Cysteine- and Methionine-free Mutant of Escherichia coli Dihydrofolate Reductase	J.Biol.Chem.	281	13234	16510443
2DRC	Escherichia coli	METHOTREXATE	1.9	1.5.1.3	1991	Investigation of the functional role of tryptophan-22 in Escherichia coli dihydrofolate reductase by site-directed mutagenesis.	Biochemistry	30	11092	1932031
2GQV	Escherichia coli		1.1	1.5.1.3	2006	High-resolution structure of a plasmid-encoded dihydrofolate reductase: pentagonal network of water molecules in the D(2)-symmetric active site.	Acta Crystallogr.,Sect.D	62	695	16790925
2P4T	Escherichia coli	NADP	1.15	1.5.1.3	2007	Structure of the Q67H mutant of R67 dihydrofolate reductase-NADP+ complex reveals a novel cofactor binding mode.	Protein Sci.	16	1063	17473013
2RH2	Escherichia coli	(4R)-2-METHYLPENTANE-2,4-DIOL	0.96	1.5.1.3	2007	Crystal Structure of a Type II Dihydrofolate Reductase Catalytic Ternary Complex	Biochemistry	46	14878	18052202
2RK1	Escherichia coli	DIHYDROFOLIC ACID, NADP, (4R)-2-METHYLPENTANE-2,4-DIOL	1.26	1.5.1.3	2007	Crystal structure of a type II dihydrofolate reductase catalytic ternary complex.	Biochemistry	46	14878	18052202
2RK2	Escherichia coli	NADP, (4R)-2-METHYLPENTANE-2,4-DIOL	1.9	1.5.1.3	2007	Crystal structure of a type II dihydrofolate reductase catalytic ternary complex.	Biochemistry	46	14878	18052202
3DAU	Escherichia coli	METHOTREXATE, NADP	1.5	1.5.1.3	2009	X-ray structure of the ternary MTX.NADPH complex of the anthrax dihydrofolate reductase: a pharmacophore for dual-site inhibitor design.	J.Struct.Biol.	166	162	19374017
3DRC	Escherichia coli	METHOTREXATE	1.9	1.5.1.3	1991	Investigation of the functional role of tryptophan-22 in Escherichia coli dihydrofolate reductase by site-directed mutagenesis.	Biochemistry	30	11092	1932031
3KFY	Escherichia coli	5-[(4-CHLOROPHENYL)SULFANYL]QUINAZOLINE-2,4-DIAMINE, NADPH	2.08	1.5.1.3		Dynamic switching and partial occupancies of a small molecule inhibitor complex of DHFR	To be Published
3OCH	Escherichia coli	(2S,2'S)-5,5'-(NONANE-1,9-DIYLDIIMINO)BIS(2-{[(4-{[(2,4-DIAMINOPTERIDIN-6-YL)METHYL](METHYL)AMINO}PHENYL)CARBONYL]AMINO}-5-OXOPENTANOIC ACID) (NON-PREFERRED NAME)	1.79	1.5.1.3	2010	Chemically Self-Assembled Antibody Nanorings (CSANs): Design and Characterization of an Anti-CD3 IgM Biomimetic.	J.Am.Chem.Soc.	132	17247	21077608
3QL0	Escherichia coli	FOLIC ACID, NADP	1.6	1.5.1.3	2011	A dynamic knockout reveals that conformational fluctuations influence the chemical step of enzyme catalysis.	Science	332	234	21474759
3QL3	Escherichia coli	FOLIC ACID, NADP	1.8	1.5.1.3	2011	A dynamic knockout reveals that conformational fluctuations influence the chemical step of enzyme catalysis.	Science	332	234	21474759
3SFM	Escherichia coli	(4R)-2-METHYLPENTANE-2,4-DIOL	1.4	1.5.1.3	2011	Novel crystallization conditions for tandem variant R67 DHFR yield a wild-type crystal structure.	Acta Crystallogr.,Sect.F	67	1316	22102224
4DFR	Escherichia coli	METHOTREXATE	1.7	1.5.1.3	1982	Crystal structures of Escherichia coli and Lactobacillus casei dihydrofolate reductase refined at 1.7 A resolution. I. General features and binding of methotrexate.	J.Biol.Chem.	257	13650	6815178
4EIG	Escherichia coli		2.5	1.5.1.3	2013	Mechanistic analysis of allosteric and non-allosteric effects arising from nanobody binding to two epitopes of the dihyrofolate reductase of Escherichia coli.	Biochim.Biophys.Acta	1834	2147	23911607
4EIZ	Escherichia coli		2.2	1.5.1.3	2013	Mechanistic analysis of allosteric and non-allosteric effects arising from nanobody binding to two epitopes of the dihyrofolate reductase of Escherichia coli.	Biochim.Biophys.Acta	1834	2147	23911607
4EJ1	Escherichia coli	FOLIC ACID	1.75	1.5.1.3	2013	Mechanistic analysis of allosteric and non-allosteric effects arising from nanobody binding to two epitopes of the dihyrofolate reductase of Escherichia coli.	Biochim.Biophys.Acta	1834	2147	23911607
4FHB	Escherichia coli	FOLIC ACID, NADP	2.8	1.5.1.3	2013	Mechanistic analysis of allosteric and non-allosteric effects arising from nanobody binding to two epitopes of the dihyrofolate reductase of Escherichia coli.	Biochim.Biophys.Acta	1834	2147	23911607
4GH8	Escherichia coli	METHOTREXATE, NADPH	1.85	1.5.1.3	2013	Functional significance of evolving protein sequence in dihydrofolate reductase from bacteria to humans.	Proc.Natl.Acad.Sci.USA	110	10159	23733948
4KJJ	Escherichia coli	FOLIC ACID, NADP	1.15	1.5.1.3	2013	Automated identification of functional dynamic contact networks from X-ray crystallography.	Nat.Methods	10	896	23913260
4KJK	Escherichia coli	FOLIC ACID, NADP	1.35	1.5.1.3	2013	Automated identification of functional dynamic contact networks from X-ray crystallography.	Nat.Methods	10	896	23913260
4KJL	Escherichia coli	FOLIC ACID, NADP	1.38	1.5.1.3	2013	Automated identification of functional dynamic contact networks from X-ray crystallography.	Nat.Methods	10	896	23913260
5DFR	Escherichia coli		2.3	1.5.1.3	1991	Crystal structure of unliganded Escherichia coli dihydrofolate reductase. Ligand-induced conformational changes and cooperativity in binding.	Biochemistry	30	2227	1998681
6DFR	Escherichia coli	NADP	2.4	1.5.1.3	1990	Crystal structures of Escherichia coli dihydrofolate reductase: the NADP+ holoenzyme and the folate.NADP+ ternary complex. Substrate binding and a model for the transition state.	Biochemistry	29	3263	2185835
7DFR	Escherichia coli	FOLIC ACID, NADP	2.5	1.5.1.3	1990	Crystal structures of Escherichia coli dihydrofolate reductase: the NADP+ holoenzyme and the folate.NADP+ ternary complex. Substrate binding and a model for the transition state.	Biochemistry	29	3263	2185835
3K74	Escherichia coli K-12		1.95	1.5.1.3	2011	Constraining enzyme conformational change by an antibody leads to hyperbolic inhibition.	J.Mol.Biol.	407	138	21238460
3QYL	Escherichia coli K-12	(7S)-7-METHYL-5,6,7,8-TETRAHYDROQUINAZOLINE-2,4-DIAMINE, NADPH	1.79	1.5.1.3	2012	Evidence for dynamics in proteins as a mechanism for ligand dissociation.	Nat.Chem.Biol.	8	246	22246400
3QYO	Escherichia coli K-12	QUINAZOLINE-2,4-DIAMINE, NADPH	2.09	1.5.1.3	2012	Evidence for dynamics in proteins as a mechanism for ligand dissociation.	Nat.Chem.Biol.	8	246	22246400
3R33	Escherichia coli K-12	(6S)-6-METHYL-5,6,7,8-TETRAHYDROQUINAZOLINE-2,4-DIAMINE, NADPH	2.09	1.5.1.3	2012	Evidence for dynamics in proteins as a mechanism for ligand dissociation.	Nat.Chem.Biol.	8	246	22246400
2INQ	Escherichia coli K12	N-(4-{[(2,4-DIAMINOPTERIDIN-1-IUM-6-YL)METHYL](METHYL)AMINO}BENZOYL)-L-GLUTAMIC ACID, DEUTERATED WATER	2.2	1.5.1.3	2006	Neutron diffraction studies of Escherichia coli dihydrofolate reductase complexed with methotrexate.	Proc.Natl.Acad.Sci.Usa	103	18493	17130456
1ZDR	Geobacillus stearothermophilus		2	1.5.1.3	2005	Structure and hydride transfer mechanism of a moderate thermophilic dihydrofolate reductase from Bacillus stearothermophilus and comparison to its mesophilic and hyperthermophilic homologues.	Biochemistry	44	11428	16114879
1AO8	Lactobacillus casei	METHOTREXATE		1.5.1.3	1998	The solution structure of the complex of Lactobacillus casei dihydrofolate reductase with methotrexate.	J.Mol.Biol.	277	119	9514736
1BZF	Lactobacillus casei	TRIMETREXATE		1.5.1.3	1999	Structure and dynamics in solution of the complex of Lactobacillus casei dihydrofolate reductase with the new lipophilic antifolate drug trimetrexate.	Protein Sci.	8	467	10091649
1DIS	Lactobacillus casei	BRODIMOPRIM-4,6-DICARBOXYLATE		1.5.1.3	1995	Solution structure of a brodimoprim analogue in its complex with Lactobacillus casei dihydrofolate reductase.	Biochemistry	34	11690	7547901
1DIU	Lactobacillus casei	BRODIMOPRIM-4,6-DICARBOXYLATE		1.5.1.3	1995	Solution structure of a brodimoprim analogue in its complex with Lactobacillus casei dihydrofolate reductase.	Biochemistry	34	11690	7547901
1LUD	Lactobacillus casei	2,4-DIAMINO-5-(3,4,5-TRIMETHOXY-BENZYL)-PYRIMIDIN-1-IUM, NADPH		1.5.1.3	2001	NMR-based solution structure of the complex of Lactobacillus casei dihydrofolate reductase with trimethoprim and NADPH	J.BIOMOL.NMR	24	67	12449420
2HM9	Lactobacillus casei	2,4-DIAMINO-5-(3,4,5-TRIMETHOXY-BENZYL)-PYRIMIDIN-1-IUM		1.5.1.3	2011	NMR structures of apo L.casei dihydrofolate reductase and its complexes with trimethoprim and NADPH. Contributions to positive cooperative binding from ligand-induced refolding, conformational changes and interligand hydrophobic interactions	Biochemistry			21410224
2HQP	Lactobacillus casei	NADPH		1.5.1.3	TO BE PUBLISHED	Structural insights into cooperative effects of ligand binding to L. casei dihydrofolate redutase
2L28	Lactobacillus casei			1.5.1.3	2011	NMR Structures of Apo L. casei Dihydrofolate Reductase and Its Complexes with Trimethoprim and NADPH: Contributions to Positive Cooperative Binding from Ligand-Induced Refolding, Conformational Changes, and Interligand Hydrophobic Interactions.	Biochemistry	50	3609	21410224
2LF1	Lactobacillus casei	NADPH DIHYDRO-NICOTINAMIDE-ADENINE-DINUCLEOTIDE PHOSPHATE		1.5.1.3	2011	NMR structures of apo L. casei dihydrofolate reductase and its complexes with trimethoprim and NADPH: contributions to positive cooperative binding from ligand-induced refolding, conformational changes, and interligand hydrophobic interactions	Biochemistry	50	3609	21410224
3DFR	Lactobacillus casei	METHOTREXATE, NADPH	1.7	1.5.1.3	1982	Crystal structures of Escherichia coli and Lactobacillus casei dihydrofolate reductase refined at 1.7 A resolution. I. General features and binding of methotrexate.	J.Biol.Chem.	257	13650	6815178
2ZZA	Moritella profunda	PENTAETHYLENE GLYCOL	2	1.5.1.3		Moritella profunda Dihydrofolate reductase complex with NADP+ and Folate	To be Published
2ZZA	Moritella profunda	FOLIC ACID, NADP	2	1.5.1.3		Moritella profunda Dihydrofolate reductase complex with NADP+ and Folate	To be Published
3IA4	Moritella profunda	METHOTREXATE, NADPH	1.7	1.5.1.3	2009	Are the Catalytic Properties of Enzymes from Piezophilic Organisms Pressure Adapted?	Chembiochem	10	2348	19681091
3IA5	Moritella profunda		2.1	1.5.1.3	2009	Are the Catalytic Properties of Enzymes from Piezophilic Organisms Pressure Adapted?	Chembiochem	10	2348	19681091
2W3V	MYCOBACTERIUM AVIUM	TRIMETHOPRIM, NADPH	1.89	1.5.1.3	To be Published	Structural Basis for Selective Inhibition of Mycobacterium Avium Dihydrofolate Reductase by a Lipophilic Antifolate
2W3W	MYCOBACTERIUM AVIUM	6-{[(2,5-DIETHOXYPHENYL)AMINO]METHYL}-5-METHYLPYRIDO[2,3-D]PYRIMIDINE-2,4-DIAMINE, NADPH	1.6	1.5.1.3	To be Published	Structural Basis for Selective Inhibition of Mycobacterium Avium Dihydrofolate Reductase by a Lipophilic Antifolate
1DF7	Mycobacterium tuberculosis	METHOTREXATE, NADPH	1.7	1.5.1.3	2000	Three-dimensional structure of M. tuberculosis dihydrofolate reductase reveals opportunities for the design of novel tuberculosis drugs.	J.Mol.Biol.	295	307	10623528
1DG5	Mycobacterium tuberculosis	TRIMETHOPRIM, NADPH	2	1.5.1.3	2000	Three-dimensional structure of M. tuberculosis dihydrofolate reductase reveals opportunities for the design of novel tuberculosis drugs.	J.Mol.Biol.	295	307	10623528
1DG7	Mycobacterium tuberculosis	1-[3-(4-BROMO-PHENOXY)-PROPOXY]-6,6-DIMETHYL-1.6-DIHYDRO-[1,3,5]TRIAZINE-2,4-DIAMINE, NADPH	1.8	1.5.1.3	2000	Three-dimensional structure of M. tuberculosis dihydrofolate reductase reveals opportunities for the design of novel tuberculosis drugs.	J.Mol.Biol.	295	307	10623528
1DG8	Mycobacterium tuberculosis	NADPH	2	1.5.1.3	2000	Three-dimensional structure of M. tuberculosis dihydrofolate reductase reveals opportunities for the design of novel tuberculosis drugs.	J.Mol.Biol.	295	307	10623528
2CIG	MYCOBACTERIUM TUBERCULOSIS	(4R)-ISONICOTINIC-ACETYL-NICOTINAMIDE-ADENINE DINUCLEOTIDE	1.9	1.5.1.3	2006	Mycobacterium Tuberculosis Dihydrofolate Reductase is a Target for Isoniazid	Nat.Struct.Mol.Biol.	13	408	16648861
2W9G	STAPHYLOCOCCUS AUREUS	TRIMETHOPRIM, NADPH	1.95	1.5.1.3	2009	Structural Comparison of Chromosomal and Exogenous Dihydrofolate Reductase from Staphylococcus Aureus in Complex with the Potent Inhibitor Trimethoprim.	Proteins	76	706	19280600
2W9H	STAPHYLOCOCCUS AUREUS	TRIMETHOPRIM	1.48	1.5.1.3	2009	Structural Comparison of Chromosomal and Exogenous Dihydrofolate Reductase from Staphylococcus Aureus in Complex with the Potent Inhibitor Trimethoprim.	Proteins	76	706	19280600
2W9S	STAPHYLOCOCCUS AUREUS	TRIMETHOPRIM, NADPH	1.8	1.5.1.3	2009	Structural Comparison of Chromosomal and Exogenous Dihydrofolate Reductase from Staphylococcus Aureus in Complex with the Potent Inhibitor Trimethoprim.	Proteins	76	706	19280600
2W9T	STAPHYLOCOCCUS AUREUS		2.35	1.5.1.3	2009	Structural Comparison of Chromosomal and Exogenous Dihydrofolate Reductase from Staphylococcus Aureus in Complex with the Potent Inhibitor Trimethoprim.	Proteins	76	706	19280600
3FRA	Staphylococcus aureus	5-[[(2R)-2-CYCLOPROPYL-7,8-DIMETHOXY-CHROMAN-5-YL]METHYL]PYRIMIDINE-2,4-DIAMINE, NADP	2.35	1.5.1.3	2009	Increased hydrophobic interactions of iclaprim with Staphylococcus aureus dihydrofolate reductase are responsible for the increase in affinity and antibacterial activity	J.Antimicrob.Chemother.	63	687	19211577
3FRB	Staphylococcus aureus	TRIMETHOPRIM, NADP	2	1.5.1.3	2009	Increased hydrophobic interactions of iclaprim with Staphylococcus aureus dihydrofolate reductase are responsible for the increase in affinity and antibacterial activity	J.Antimicrob.Chemother.	63	687	19211577
3FRD	Staphylococcus aureus	DIHYDROFOLIC ACID, NADP	2.1	1.5.1.3	2009	Increased hydrophobic interactions of iclaprim with Staphylococcus aureus dihydrofolate reductase are responsible for the increase in affinity and antibacterial activity	J.Antimicrob.Chemother.	63	687	19211577
3FRE	Staphylococcus aureus	TRIMETHOPRIM, NADP	2.2	1.5.1.3	2009	Increased hydrophobic interactions of iclaprim with Staphylococcus aureus dihydrofolate reductase are responsible for the increase in affinity and antibacterial activity	J.Antimicrob.Chemother.	63	687	19211577
3FRF	Staphylococcus aureus	5-[[(2R)-2-CYCLOPROPYL-7,8-DIMETHOXY-2H-CHROMEN-5-YL]METHYL]PYRIMIDINE-2,4-DIAMINE, NADP	2.2	1.5.1.3	2009	Increased hydrophobic interactions of iclaprim with Staphylococcus aureus dihydrofolate reductase are responsible for the increase in affinity and antibacterial activity	J.Antimicrob.Chemother.	63	687	19211577
3FY8	Staphylococcus aureus	5-[[(2R)-2-CYCLOPROPYL-7,8-DIMETHOXY-CHROMAN-5-YL]METHYL]PYRIMIDINE-2,4-DIAMINE, NADP	2.2	1.5.1.3	2009	Inhibitory properties and X-ray crystallographic study of the binding of AR-101, AR-102 and iclaprim in ternary complexes with NADPH and dihydrofolate reductase from Staphylococcus aureus	Acta Crystallogr.,Sect.D	65	751	19622858
3FY9	Staphylococcus aureus	5-[[(2R)-2-CYCLOPROPYL-7,8-DIMETHOXY-2H-CHROMEN-5-YL]METHYL]PYRIMIDINE-2,4-DIAMINE, NADP	2.25	1.5.1.3	2009	Inhibitory properties and X-ray crystallographic study of the binding of AR-101, AR-102 and iclaprim in ternary complexes with NADPH and dihydrofolate reductase from Staphylococcus aureus	Acta Crystallogr.,Sect.D	65	751	19622858
3FYV	Staphylococcus aureus	5-[[(2R)-2-CYCLOPROPYL-7,8-DIMETHOXY-2H-CHROMEN-5-YL]METHYL]PYRIMIDINE-2,4-DIAMINE, NADP	2.2	1.5.1.3	2009	Inhibitory properties and X-ray crystallographic study of the binding of AR-101, AR-102 and iclaprim in ternary complexes with NADPH and dihydrofolate reductase from Staphylococcus aureus	Acta Crystallogr.,Sect.D	65	751	19622858
3FYW	Staphylococcus aureus	5-[[(2R)-2-CYCLOPROPYL-7,8-DIMETHOXY-CHROMAN-5-YL]METHYL]PYRIMIDINE-2,4-DIAMINE, NADP	2.1	1.5.1.3	2009	Inhibitory properties and X-ray crystallographic study of the binding of AR-101, AR-102 and iclaprim in ternary complexes with NADPH and dihydrofolate reductase from Staphylococcus aureus	Acta Crystallogr.,Sect.D	65	751	19622858
3I8A	Staphylococcus aureus	5-[3-(2,5-DIMETHOXYPHENYL)PROP-1-YN-1-YL]-6-ETHYLPYRIMIDINE-2,4-DIAMINE, NADP	2.41	1.5.1.3	2010	Towards the understanding of resistance mechanisms in clinically isolated trimethoprim-resistant, methicillin-resistant Staphylococcus aureus dihydrofolate reductase.	J.Struct.Biol.	170	93	20026215
3LG4	Staphylococcus aureus	5-[(3S)-3-(5-METHOXY-2',6'-DIMETHYLBIPHENYL-3-YL)BUT-1-YN-1-YL]-6-METHYLPYRIMIDINE-2,4-DIAMINE, NADP	3.15	1.5.1.3	2010	Predicting resistance mutations using protein design algorithms.	Proc.Natl.Acad.Sci.USA	107	13707	20643959
3M08	Staphylococcus aureus	5-(3,4-DIMETHOXY-5-{(1E)-3-OXO-3-[(1S)-1-PROPYLPHTHALAZIN-2(1H)-YL]PROP-1-EN-1-YL}BENZYL)PYRIMIDINE-2,4-DIAMINE, NADP	2.01	1.5.1.3	2010	Inhibition of Antibiotic-Resistant Staphylococcus aureus by the Broad-Spectrum Dihydrofolate Reductase Inhibitor RAB1.	Antimicrob.Agents Chemother.	54	3825	20606069
3M09	Staphylococcus aureus	5-(3,4-DIMETHOXY-5-{(1E)-3-OXO-3-[(1S)-1-PROPYLPHTHALAZIN-2(1H)-YL]PROP-1-EN-1-YL}BENZYL)PYRIMIDINE-2,4-DIAMINE, NADP	2.01	1.5.1.3	2010	Inhibition of Antibiotic-Resistant Staphylococcus aureus by the Broad-Spectrum Dihydrofolate Reductase Inhibitor RAB1.	Antimicrob.Agents Chemother.	54	3825	20606069
3SGY	Staphylococcus aureus	6-ETHYL-5-{(3S)-3-[3-METHOXY-5-(PYRIDIN-4-YL)PHENYL]BUT-1-YN-1-YL}PYRIMIDINE-2,4-DIAMINE, NADP	2.6	1.5.1.3	2012	Toward New Therapeutics for Skin and Soft Tissue Infections: Propargyl-Linked Antifolates Are Potent Inhibitors of MRSA and Streptococcus pyogenes.	Plos One	7	e29434	22347365
3SGY	Staphylococcus aureus	6-ETHYL-5-{(3S)-3-[3-METHOXY-5-(PYRIDIN-4-YL)PHENYL]BUT-1-YN-1-YL}PYRIMIDINE-2,4-DIAMINE, NADP	2.6	1.5.1.3	2012	Toward New Therapeutics for Skin and Soft Tissue Infections: Propargyl-Linked Antifolates Are Potent Inhibitors of MRSA and Streptococcus pyogenes.	Plos One	7	e29434	22347365
3SH2	Staphylococcus aureus	6-ETHYL-5-[3-(4-METHOXYBIPHENYL-3-YL)PROP-1-YN-1-YL]PYRIMIDINE-2,4-DIAMINE, NADP	3	1.5.1.3	2012	Toward New Therapeutics for Skin and Soft Tissue Infections: Propargyl-Linked Antifolates Are Potent Inhibitors of MRSA and Streptococcus pyogenes.	Plos One	7	e29434	22347365
3SQY	Staphylococcus aureus	7-(2-METHOXYPHENYL)QUINAZOLINE-2,4-DIAMINE, NADP	1.5	1.5.1.3	2011	Structure-based design of new DHFR-based antibacterial agents: 7-aryl-2,4-diaminoquinazolines.	Bioorg.Med.Chem.Lett.	21	5171	21831637
3SR5	Staphylococcus aureus	7-(3,4-DIMETHOXYPHENYL)-6-METHYLQUINAZOLINE-2,4-DIAMINE, NADP	1.68	1.5.1.3	2011	Structure-based design of new DHFR-based antibacterial agents: 7-aryl-2,4-diaminoquinazolines.	Bioorg.Med.Chem.Lett.	21	5171	21831637
3SRQ	Staphylococcus aureus	1-[3-(2,4-DIAMINO-6-METHYLQUINAZOLIN-7-YL)PHENYL]ETHANONE, NADP	1.69	1.5.1.3	2011	Structure-based design of new DHFR-based antibacterial agents: 7-aryl-2,4-diaminoquinazolines.	Bioorg.Med.Chem.Lett.	21	5171	21831637
3SRR	Staphylococcus aureus	3-(2,4-DIAMINO-6-METHYLQUINAZOLIN-7-YL)-4-ETHOXYBENZALDEHYDE, NADP	1.7	1.5.1.3	2011	Structure-based design of new DHFR-based antibacterial agents: 7-aryl-2,4-diaminoquinazolines.	Bioorg.Med.Chem.Lett.	21	5171	21831637
3SRS	Staphylococcus aureus	7-(5-BROMO-2-ETHOXYPHENYL)-6-METHYLQUINAZOLINE-2,4-DIAMINE, NADP	1.7	1.5.1.3	2011	Structure-based design of new DHFR-based antibacterial agents: 7-aryl-2,4-diaminoquinazolines.	Bioorg.Med.Chem.Lett.	21	5171	21831637
3SRU	Staphylococcus aureus	N-[3'-(2,4-DIAMINOQUINAZOLIN-7-YL)-4'-ETHOXYBIPHENYL-3-YL]METHANESULFONAMIDE, NADP	1.7	1.5.1.3	2011	Structure-based design of new DHFR-based antibacterial agents: 7-aryl-2,4-diaminoquinazolines.	Bioorg.Med.Chem.Lett.	21	5171	21831637
3SRW	Staphylococcus aureus	7-(2-ETHOXYNAPHTHALEN-1-YL)-6-METHYLQUINAZOLINE-2,4-DIAMINE, NADP	1.7	1.5.1.3	2011	Structure-based design of new DHFR-based antibacterial agents: 7-aryl-2,4-diaminoquinazolines.	Bioorg.Med.Chem.Lett.	21	5171	21831637
4FGG	Staphylococcus aureus	(2E)-3-{5-[(2,4-DIAMINO-6-PROPYLPYRIMIDIN-5-YL)METHYL]-2,3-DIMETHOXYPHENYL}-1-[(1S)-1-(2-METHYLPROP-1-EN-1-YL)PHTHALAZIN-2(1H)-YL]PROP-2-EN-1-ONE, NADP	2.3	1.5.1.3	2012	Inhibition of Bacterial Dihydrofolate Reductase by 6-Alkyl-2,4-diaminopyrimidines.	Chemmedchem			22930550
4FGH	Staphylococcus aureus	(2E)-3-{5-[(2,4-DIAMINO-6-ETHYLPYRIMIDIN-5-YL)METHYL]-2,3-DIMETHOXYPHENYL}-1-[(1S)-1-(2-METHYLPROP-1-EN-1-YL)PHTHALAZIN-2(1H)-YL]PROP-2-EN-1-ONE, NADP	2.5	1.5.1.3	2012	Inhibition of Bacterial Dihydrofolate Reductase by 6-Alkyl-2,4-diaminopyrimidines.	Chemmedchem			22930550
3F0B	Staphylococcus aureus RF122	5-[(3R)-3-(5-METHOXYBIPHENYL-3-YL)BUT-1-YN-1-YL]-6-METHYLPYRIMIDINE-2,4-DIAMINE, NADP	2.1	1.5.1.3	2009	Crystal structures of wild-type and mutant methicillin-resistant Staphylococcus aureus dihydrofolate reductase reveal an alternate conformation of NADPH that may be linked to trimethoprim resistance.	J.Mol.Biol.	387	1298	19249312
3F0Q	Staphylococcus aureus RF122	5-[(3S)-3-(5-METHOXY-2',6'-DIMETHYLBIPHENYL-3-YL)BUT-1-YN-1-YL]-6-METHYLPYRIMIDINE-2,4-DIAMINE, NADP	2.08	1.5.1.3	2010	Predicting resistance mutations using protein design algorithms.	Proc.Natl.Acad.Sci.USA	107	13707	20643959
3F0S	Staphylococcus aureus RF122	5-[(3R)-3-(5-METHOXY-3',5'-DIMETHYLBIPHENYL-3-YL)BUT-1-YN-1-YL]-6-METHYLPYRIMIDINE-2,4-DIAMINE, NADP	2.7	1.5.1.3		Crystallographic Complexes of Wildtype and Mutant MRSA DHFR Reveal Interactions for Lead Design	To be Published
3F0U	Staphylococcus aureus RF122	5-[(3R)-3-(5-METHOXYBIPHENYL-3-YL)BUT-1-YN-1-YL]-6-METHYLPYRIMIDINE-2,4-DIAMINE, NADP	1.6	1.5.1.3	2009	Crystal structures of wild-type and mutant methicillin-resistant Staphylococcus aureus dihydrofolate reductase reveal an alternate conformation of NADPH that may be linked to trimethoprim resistance.	J.Mol.Biol.	387	1298	19249312
3F0V	Staphylococcus aureus RF122	5-[(3S)-3-(5-METHOXY-2',6'-DIMETHYLBIPHENYL-3-YL)BUT-1-YN-1-YL]-6-METHYLPYRIMIDINE-2,4-DIAMINE, NADP	2.35	1.5.1.3	To be Published	Crystallographic Complexes of Wildtype and Mutant MRSA DHFR Reveal Interactions for Lead Design
3F0X	Staphylococcus aureus RF122	5-[(3R)-3-(5-METHOXY-3',5'-DIMETHYLBIPHENYL-3-YL)BUT-1-YN-1-YL]-6-METHYLPYRIMIDINE-2,4-DIAMINE, NADP	2.6	1.5.1.3	To be Published	Crystallographic Complexes of Wildtype and Mutant MRSA DHFR Reveal Interactions for Lead Design
3FQ0	Staphylococcus aureus RF122	5-[3-(2,5-DIMETHOXYPHENYL)PROP-1-YN-1-YL]-6-ETHYLPYRIMIDINE-2,4-DIAMINE, NADP	1.69	1.5.1.3	2009	Crystal structures of wild-type and mutant methicillin-resistant Staphylococcus aureus dihydrofolate reductase reveal an alternate conformation of NADPH that may be linked to trimethoprim resistance.	J.Mol.Biol.	387	1298	19249312
3FQC	Staphylococcus aureus RF122	6-METHYL-5-[3-METHYL-3-(3,4,5-TRIMETHOXYPHENYL)BUT-1-YN-1-YL]PYRIMIDINE-2,4-DIAMINE, NADP	2.35	1.5.1.3	2009	Crystal structures of wild-type and mutant methicillin-resistant Staphylococcus aureus dihydrofolate reductase reveal an alternate conformation of NADPH that may be linked to trimethoprim resistance.	J.Mol.Biol.	387	1298	19249312
3FQC	Staphylococcus aureus RF122	6-METHYL-5-[3-METHYL-3-(3,4,5-TRIMETHOXYPHENYL)BUT-1-YN-1-YL]PYRIMIDINE-2,4-DIAMINE, NADP	2.35	1.5.1.3	2009	Crystal structures of wild-type and mutant methicillin-resistant Staphylococcus aureus dihydrofolate reductase reveal an alternate conformation of NADPH that may be linked to trimethoprim resistance.	J.Mol.Biol.	387	1298	19249312
3FQF	Staphylococcus aureus RF122	6-METHYL-5-[3-METHYL-3-(3,4,5-TRIMETHOXYPHENYL)BUT-1-YN-1-YL]PYRIMIDINE-2,4-DIAMINE, NADP	1.77	1.5.1.3	2009	Crystal structures of wild-type and mutant methicillin-resistant Staphylococcus aureus dihydrofolate reductase reveal an alternate conformation of NADPH that may be linked to trimethoprim resistance.	J.Mol.Biol.	387	1298	19249312
3FQO	Staphylococcus aureus RF122	5-[3-(2,5-DIMETHOXYPHENYL)PROP-1-YN-1-YL]-6-ETHYLPYRIMIDINE-2,4-DIAMINE, NADP	2.09	1.5.1.3	2009	Crystal structures of wild-type and mutant methicillin-resistant Staphylococcus aureus dihydrofolate reductase reveal an alternate conformation of NADPH that may be linked to trimethoprim resistance.	J.Mol.Biol.	387	1298	19249312
3FQV	Staphylococcus aureus RF122	5-[(3S)-3-(2-METHOXYBIPHENYL-4-YL)BUT-1-YN-1-YL]-6-METHYLPYRIMIDINE-2,4-DIAMINE, NADP	1.85	1.5.1.3	2009	Crystal structures of wild-type and mutant methicillin-resistant Staphylococcus aureus dihydrofolate reductase reveal an alternate conformation of NADPH that may be linked to trimethoprim resistance.	J.Mol.Biol.	387	1298	19249312
3FQZ	Staphylococcus aureus RF122	5-[(3S)-3-(2-METHOXYBIPHENYL-4-YL)BUT-1-YN-1-YL]-6-METHYLPYRIMIDINE-2,4-DIAMINE, NADP	1.72	1.5.1.3	2009	Crystal structures of wild-type and mutant methicillin-resistant Staphylococcus aureus dihydrofolate reductase reveal an alternate conformation of NADPH that may be linked to trimethoprim resistance.	J.Mol.Biol.	387	1298	19249312
3IX9	Streptococcus pneumoniae	METHOTREXATE, NADPH	1.95	1.5.1.3	2010	Kinetic and structural characterization of dihydrofolate reductase from Streptococcus pneumoniae	Biochemistry	49	195	19950924
1CZ3	Thermotoga maritima		2.1	1.5.1.3	2000	The crystal structure of dihydrofolate reductase from Thermotoga maritima: molecular features of thermostability.	J.Mol.Biol.	297	659	10731419
1D1G	Thermotoga maritima	METHOTREXATE, NADPH	2.1	1.5.1.3	2000	The crystal structure of dihydrofolate reductase from Thermotoga maritima: molecular features of thermostability.	J.Mol.Biol.	297	659	10731419
3Q1H	Yersinia pestis		1.8	1.5.1.3	To be Published	Crystal Structure of Dihydrofolate Reductase from Yersinia pestis
